# Supplementary material
Source: Research Square preprint supplement (doi:10.21203/rs.3.rs-9713824/v1)
Supplement: Supplementary file 1 [file 8d60f92fd166446504490c3d.xlsx]

## Sheet: 0_Ringkasan
Komponen	Keterangan
Judul Penelitian	Manajemen Pembelajaran Pendidikan Agama Islam (PAI) Berbasis Kearifan Lokal dalam Membentuk Sensitivitas Interkultural Siswa SMK Pariwisata
Peneliti	[Nama Peneliti]
Tanggal Analisis	11-05-2026
Lokus Penelitian	SMKN 1 Batulayar, SMKN 1 Lingsar, SMKN 1 Gerung (Kabupaten Lombok Barat)
Fokus Penelitian	(1) Perencanaan, (2) Pelaksanaan, (3) Evaluasi Pembelajaran PAI
Sumber Data Kualitatif	Wawancara mendalam, Observasi partisipatif, Dokumentasi
Jumlah Unit Data	54 unit data (18 per lokus)
Jumlah Informan Wawancara	27 informan (9 per lokus: Kepala Sekolah, Waka Kurikulum, Guru PAI, Tokoh Adat/Agama, Siswa)
Jumlah Sesi Observasi	9 sesi observasi (3 per lokus: Kelas, Kegiatan Budaya, Rapat/Supervisi)
Jumlah Dokumen	18 dokumen (6 per lokus: ATP, RPP, Modul, Instrumen Penilaian, SK, Laporan)
Jumlah Tema Utama	6 Tema Utama
Jumlah Sub Tema	18 Sub Tema
Metode Analisis	Analisis Data Kualitatif - Interactive Model
Model Miles & Huberman	Reduksi Data → Display Data (Matriks) → Penarikan Kesimpulan & Verifikasi

## Sheet: 1_Redaksi_Data
No	Sumber Data	Lokus/Sekolah	Fokus	Data Mentah (Kutipan/Deskripsi)	Kode	Kategori Awal	Catatan Reduksi
1	Dokumentasi	SMKN 1 Batulayar	Perencanaan	Dokumen ATP, RPP, modul ajar menunjukkan integrasi nilai Islam dan kearifan lokal Sasak secara konsisten dalam tujuan pembelajaran	B-D1	Integrasi Nilai	Integrasi Islam-Sasak dalam dokumen perencanaan
2	Dokumentasi	SMKN 1 Batulayar	Perencanaan	Tujuan pembelajaran menekankan pembentukan karakter religius, etos kerja, dan kepekaan antarbudaya siswa jurusan pariwisata	B-D2	Kontekstualitas	Fokus pada karakter religius dan kepekaan antarbudaya
3	Wawancara	SMKN 1 Batulayar	Perencanaan	Kepala sekolah: "Perencanaan PAI kita tidak sekadar administratif, tapi jembatan antara agama dan realitas sosial"	B-W1	Integrasi Nilai	Perencanaan sebagai cultural bridge
4	Dokumentasi	SMKN 1 Batulayar	Perencanaan	Kebijakan kurikulum, KOSP, P5, dan program Sabtu Budaya menunjukkan kolaborasi TPKS dengan tokoh adat, agama, dan mitra industri	B-D3	Kolaborasi	Kolaborasi multi-stakeholder terinstitusionalisasi
5	Wawancara	SMKN 1 Batulayar	Perencanaan	Waka Kurikulum: "Kami libatkan stakeholder pariwisata dalam perencanaan agar PAI relevan dengan dunia kerja"	B-W2	Kontekstualitas	Keterlibatan industri pariwisata
6	Wawancara	SMKN 1 Batulayar	Perencanaan	Guru PAI: "Nilai lokal dipetakan ke dimensi individual, sosial, dan spiritual-transendental secara sistematis"	B-W3	Sistematisasi Nilai	Pemetaan nilai berlapis (individual-sosial-spiritual)
7	Observasi	SMKN 1 Batulayar	Pelaksanaan	Observasi P5: Siswa mengerjakan proyek kepariwisataan beretika Islami dengan melibatkan interaksi langsung wisatawan	B-O1	Experiential Learning	P5 dan proyek kepariwisataan beretika Islami
8	Wawancara	SMKN 1 Batulayar	Pelaksanaan	Guru PAI: "Siswa belajar tidak hanya dari buku, tapi dari pengalaman nyata melayani wisatawan berbeda budaya"	B-W4	Experiential Learning	Pengalaman autentik melayani wisatawan
9	Observasi	SMKN 1 Batulayar	Pelaksanaan	Observasi Sabtu Budaya: Siswa non-Muslim berpartisipasi aktif dalam kegiatan budaya sekolah	B-O2	Inklusivitas	Partisipasi siswa non-Muslim
10	Wawancara	SMKN 1 Batulayar	Pelaksanaan	Tokoh FKUB: "Dialog lintas agama menjadi bagian pembelajaran PAI, bukan sekadar ekstrakurikuler"	B-W5	Dialog Lintas Agama	Dialog lintas agama melalui FKUB
11	Observasi	SMKN 1 Batulayar	Pelaksanaan	Observasi kelas: Guru menggunakan narasi lokal Sasak dan melibatkan tokoh adat dalam pembelajaran	B-O3	Adaptasi Pedagogis	Penggunaan narasi lokal dan tokoh adat
12	Wawancara	SMKN 1 Batulayar	Pelaksanaan	Siswa: "Saya jadi paham bahwa profesionalitas dan etika kerja itu bagian dari ibadah"	B-W6	Transformasi Sikap	Pergeseran moral knowing ke moral doing
13	Dokumentasi	SMKN 1 Batulayar	Evaluasi	Dokumen penilaian: Instrumen sikap mencakup indikator toleransi, keterbukaan, dan penghargaan terhadap perbedaan	B-D4	Evaluasi Afektif	Instrumen sikap mencakup toleransi
14	Wawancara	SMKN 1 Batulayar	Evaluasi	Guru PAI: "Kami gunakan refleksi tertulis dan lisan untuk melihat perkembangan kesadaran interkultural siswa"	B-W7	Refleksi	Refleksi untuk melihat perkembangan kesadaran
15	Observasi	SMKN 1 Batulayar	Evaluasi	Observasi: Penilaian sikap dilakukan melalui observasi keterlibatan siswa dalam kegiatan budaya dan proyek P5	B-O4	Evaluasi Kontekstual	Observasi keterlibatan dalam kegiatan budaya
16	Dokumentasi	SMKN 1 Batulayar	Evaluasi	Dokumen: Penilaian holistik mengaitkan ranah kognitif, afektif, dan sosial secara terpadu	B-D5	Evaluasi Holistik	Penilaian holistik kognitif-afektif-sosial
17	Wawancara	SMKN 1 Batulayar	Evaluasi	Kepala Sekolah: "Evaluasi PAI kita berfungsi sebagai mekanisme penguatan karakter, bukan sekadar penentu kelulusan"	B-W8	Transformasi Karakter	Evaluasi sebagai penguatan karakter
18	Wawancara	SMKN 1 Batulayar	Evaluasi	Wisatawan (mitra): "Siswa PKL di hotel kami menunjukkan etika dan komunikasi lintas budaya yang baik"	B-W9	Capaian Praktik	Konfirmasi dari mitra industri
19	Dokumentasi	SMKN 1 Lingsar	Perencanaan	Dokumen: Integrasi nilai Sasak (lomboq, pacu, solah, soloh) dikaitkan dengan konsep al-Kulliyat al-Khamsah dalam maqashid asy-syariah	L-D1	Landasan Epistemologi	Kaitan nilai Sasak dengan al-Kulliyat al-Khamsah
20	Wawancara	SMKN 1 Lingsar	Perencanaan	Guru PAI: "Budaya lokal kita posisikan sebagai medium pedagogis yang sahih secara teologis, bukan sekadar simbol"	L-W1	Landasan Epistemologi	Posisi budaya sebagai medium pedagogis teologis
21	Dokumentasi	SMKN 1 Lingsar	Perencanaan	Dokumen: Praktik budaya prang topat, Sabtu Budaya, dan kegiatan lintas agama dijadikan sumber belajar	L-D2	Konteks Multikultural	Praktik budaya sebagai sumber belajar
22	Wawancara	SMKN 1 Lingsar	Perencanaan	Tokoh Adat: "Kolaborasi antara sekolah dan komunitas memastikan nilai lokal hidup dalam perencanaan PAI"	L-W2	Kolaborasi	Kolaborasi sekolah-komunitas
23	Observasi	SMKN 1 Lingsar	Perencanaan	Observasi rapat: Kepala sekolah, guru PAI, dan tokoh lintas agama berdiskusi menyusun program P5	L-O1	Kolaborasi	Diskusi perencanaan melibatkan multi-pihak
24	Wawancara	SMKN 1 Lingsar	Perencanaan	Guru PAI: "Perencanaan kita berorientasi pada lived experience siswa dalam masyarakat majemuk"	L-W3	Lived Experience	Orientasi pada pengalaman hidup siswa
25	Observasi	SMKN 1 Lingsar	Pelaksanaan	Observasi: Guru menggunakan Project Based Learning dengan kasus sosial aktual keberagaman di Lombok Barat	L-O2	Metode Interaktif	PBL dengan kasus sosial aktual
26	Wawancara	SMKN 1 Lingsar	Pelaksanaan	Siswa: "Melalui role play lintas budaya, saya belajar memahami perspektif orang lain"	L-W4	Metode Interaktif	Role play lintas budaya
27	Observasi	SMKN 1 Lingsar	Pelaksanaan	Observasi: Diskusi kelas membuka ruang dialog dan negosiasi makna antar siswa berbeda latar belakang	L-O3	Dialog Pedagogis	Ruang dialog dan negosiasi makna
28	Wawancara	SMKN 1 Lingsar	Pelaksanaan	Guru PAI: "Kami tidak monolog, tapi dialogis. Siswa harus mendengar, merespons, dan merefleksikan"	L-W5	Dialog Pedagogis	Pembelajaran dialogis
29	Observasi	SMKN 1 Lingsar	Pelaksanaan	Observasi: Siswa menulis jurnal reflektif tentang pengalaman interaksi lintas budaya	L-O4	Refleksi	Jurnal reflektif interaksi lintas budaya
30	Wawancara	SMKN 1 Lingsar	Pelaksanaan	Siswa: "Refleksi membuat saya sadar sikap mana yang perlu diperbaiki dalam menghadapi perbedaan"	L-W6	Transformasi Sikap	Kesadaran diri dan perbaikan sikap
31	Dokumentasi	SMKN 1 Lingsar	Evaluasi	Dokumen: Instrumen evaluasi mencakup observasi sikap, portofolio, dan catatan reflektif berkelanjutan	L-D3	Evaluasi Formatif	Observasi, portofolio, catatan reflektif
32	Wawancara	SMKN 1 Lingsar	Evaluasi	Guru PAI: "Supervisi kepala sekolah memperkuat integrasi nilai keislaman, lokal, dan interkultural dalam evaluasi"	L-W7	Supervisi	Supervisi visioner kepala sekolah
33	Observasi	SMKN 1 Lingsar	Evaluasi	Observasi: Guru PAI berkolaborasi dengan guru PPKn dan Bahasa Indonesia menyelaraskan penilaian karakter	L-O5	Kolaborasi Guru	Kolaborasi lintas guru mapel
34	Dokumentasi	SMKN 1 Lingsar	Evaluasi	Dokumen: Hasil PKL menunjukkan capaian tinggi etika, kerja sama, dan komunikasi lintas budaya	L-D4	Capaian PKL	Capaian PKL etika dan komunikasi
35	Wawancara	SMKN 1 Lingsar	Evaluasi	Kepala Sekolah: "Evaluasi kita inklusif dan terkoordinasi, bukan hanya tanggung jawab guru PAI sendiri"	L-W8	Koordinasi	Koordinasi inklusif antar guru
36	Observasi	SMKN 1 Lingsar	Evaluasi	Observasi: Sabtu Budaya menjadi arena evaluatif informal perilaku interkultural siswa	L-O6	Evaluasi Autentik	Evaluasi informal dalam Sabtu Budaya
37	Dokumentasi	SMKN 1 Gerung	Perencanaan	Dokumen CP, ATP, modul: Nilai leq, pacu, isin, ajinang, solah, reme, paut, lomboq dipetakan ke tujuan dan materi	G-D1	Pemetaan Nilai	Nilai lokal dipetakan ke CP, ATP, modul
38	Wawancara	SMKN 1 Gerung	Perencanaan	Guru PAI: "Perencanaan kita adalah blueprint kultural, bukan sekadar dokumen administrasi"	G-W1	Blueprint Kultural	Perencanaan sebagai blueprint kultural
39	Dokumentasi	SMKN 1 Gerung	Perencanaan	Dokumen: Nilai budaya dikaitkan dengan prinsip Islam, al-Kulliyat al-Khamsah, etika pelayanan, dan dakwah inklusif	G-D2	Kedalaman Kurikuler	Kaitan nilai budaya dengan prinsip Islam
40	Wawancara	SMKN 1 Gerung	Perencanaan	Waka Kurikulum: "Kami arahkan PAI untuk membentuk siswa religius sekaligus profesional pariwisata"	G-W2	Responsivitas Vokasional	Orientasi pada kompetensi moral pariwisata
41	Observasi	SMKN 1 Gerung	Perencanaan	Observasi: MGMP internal dan koordinasi lintas mapel melibatkan tokoh adat dan lembaga eksternal	G-O1	Kolaborasi Komunitas	MGMP dan koordinasi lintas mapel
42	Wawancara	SMKN 1 Gerung	Perencanaan	Guru PAI: "Strategi kita partisipatif, reflektif, dan ethno-pedagogik. Kelas adalah learning community"	G-W3	Ethno-Pedagogik	Pendekatan student-centered dan ethno-pedagogik
43	Observasi	SMKN 1 Gerung	Pelaksanaan	Observasi: Guru mengangkat studi kasus fenomena nyata interaksi antaragama dan wisatawan dengan masyarakat lokal	G-O2	Studi Kasus	Studi kasus interaksi antaragama
44	Wawancara	SMKN 1 Gerung	Pelaksanaan	Siswa: "Dari studi kasus, saya belajar mengidentifikasi dilema etis dan merumuskan sikap berdasarkan nilai Islam dan Sasak"	G-W4	Studi Kasus	Kemampuan identifikasi dilema etis
45	Observasi	SMKN 1 Gerung	Pelaksanaan	Observasi: Siswa melakukan observasi lapangan terhadap praktik sosial-religius dan tradisi keagamaan	G-O3	Observasi Lapangan	Observasi praktik sosial-religius
46	Wawancara	SMKN 1 Gerung	Pelaksanaan	Guru PAI: "Nilai Islam dan budaya kita jadikan living values yang dialami langsung siswa"	G-W5	Living Values	Nilai sebagai living values
47	Observasi	SMKN 1 Gerung	Pelaksanaan	Observasi: Integrasi nilai isin, sopan santun, dan martabat komunitas dengan tuntutan profesional pariwisata	G-O4	Integrasi Profesional	Integrasi etika, budaya, profesionalisme
48	Wawancara	SMKN 1 Gerung	Pelaksanaan	Siswa: "Saya belajar tidak hanya menerima perbedaan, tapi menganalisis dan merespons secara etis"	G-W6	Analisis Kritis	Kemampuan analisis dan respons etis
49	Dokumentasi	SMKN 1 Gerung	Evaluasi	Dokumen: Evaluasi kognitif berorientasi nilai universal dan kontekstual, tidak hanya penguasaan materi keagamaan	G-D3	Evaluasi Kognitif-Kontekstual	Evaluasi tidak hanya materi keagamaan
50	Wawancara	SMKN 1 Gerung	Evaluasi	Guru PAI: "Kami nilai keterpaduan etika Islam, budaya Sasak, dan tuntutan dunia kerja pariwisata"	G-W7	Integrasi Nilai	Keterpaduan etika Islam-budaya-dunia kerja
51	Observasi	SMKN 1 Gerung	Evaluasi	Observasi: Penilaian afektif menggunakan indikator empati, kerja sama, kesopanan, dan penghargaan perbedaan	G-O5	Evaluasi Afektif	Indikator empati, kerja sama, kesopanan
52	Dokumentasi	SMKN 1 Gerung	Evaluasi	Dokumen: Nilai gotong royong, solah perateq, bedadayan, saduq dijadikan indikator evaluasi sikap	G-D4	Indikator Budaya	Nilai gotong royong, solah perateq, bedadayan
53	Wawancara	SMKN 1 Gerung	Evaluasi	Guru PAI: "Jurnal refleksi dan laporan pengalaman siswa menjadi sarana pembelajaran reflektif"	G-W8	Refleksi	Jurnal refleksi sebagai pembelajaran
54	Dokumentasi	SMKN 1 Gerung	Evaluasi	Dokumen: Hasil evaluasi dibahas dalam forum guru sebagai dasar perbaikan pembelajaran berkelanjutan	G-D5	Feedback Loop	Forum guru untuk perbaikan berkelanjutan

## Sheet: 2_Display_Data
Tema Utama	Sub Tema	Kode Data (Batulayar)	Kode Data (Lingsar)	Kode Data (Gerung)	Deskripsi Pola
Tema 1: Integrasi Nilai Islam dan Kearifan Lokal Sasak	1.1 Pemetaan Nilai Islam-Sasak dalam Dokumen Kurikulum	B-D1, B-D2, B-W3	L-D1, L-D2	G-D1, G-D2	Ketiga sekolah memetakan nilai Islam-Sasak ke dokumen kurikulum, namun dengan kedalaman berbeda: Batulayar (integratif-kontekstual), Lingsar (epistemologis-teologis), Gerung (sistemik-filosofis)
Tema 1: Integrasi Nilai Islam dan Kearifan Lokal Sasak	1.2 Landasan Epistemologi Integrasi Nilai	B-W1	L-W1	G-W1	Lingsar menonjol dengan kaitan eksplisit ke al-Kulliyat al-Khamsah; Batulayar dan Gerung lebih kontekstual-pragmatis
Tema 1: Integrasi Nilai Islam dan Kearifan Lokal Sasak	1.3 Nilai Lokal sebagai Medium Pedagogis	B-O3	L-W1	G-W3	Semua sekolah menggunakan nilai lokal sebagai medium pembelajaran, namun Gerung lebih menekankan ethno-pedagogik
Tema 2: Kolaborasi Multi-Stakeholder dalam Perencanaan PAI	2.1 Kolaborasi Sekolah-Komunitas-Adat-Agama	B-D3, B-W2	L-W2, L-O1	G-O1, G-W2	Kolaborasi terinstitusionalisasi di ketiga sekolah melalui TPKS/MGMP, namun aktor berbeda: Batulayar (industri pariwisata), Lingsar (tokoh lintas agama), Gerung (tokoh adat)
Tema 2: Kolaborasi Multi-Stakeholder dalam Perencanaan PAI	2.2 Keterlibatan Industri Pariwisata	B-W2	-	G-W2	Hanya Batulayar yang melibatkan mitra industri pariwisata secara intensif dalam perencanaan
Tema 2: Kolaborasi Multi-Stakeholder dalam Perencanaan PAI	2.3 Koordinasi Lintas Guru dan Manajemen Sekolah	B-W8	L-W8	G-W8	Lingsar menonjol dengan supervisi visioner kepala sekolah; Batulayar dan Gerung lebih pada koordinasi struktural
Tema 3: Kontekstualitas Pembelajaran PAI terhadap Kebutuhan Pariwisata	3.1 Relevansi dengan Dunia Kerja Multikultural	B-W2, B-W4	L-W3	G-W2	Batulayar paling responsif terhadap tuntutan dunia kerja pariwisata; Gerung fokus pada kompetensi moral; Lingsar pada lived experience
Tema 3: Kontekstualitas Pembelajaran PAI terhadap Kebutuhan Pariwisata	3.2 Konteks Sosial-Budaya Lokal sebagai Sumber Belajar	B-O1, B-O2	L-D2, L-O1	G-O2, G-O3	Lingsar memanfaatkan konteks multikultural Islam-Hindu; Batulayar paparan wisatawan global; Gerung homogenitas sosial lokal
Tema 3: Kontekstualitas Pembelajaran PAI terhadap Kebutuhan Pariwisata	3.3 Adaptasi terhadap Karakteristik Siswa Vokasi	B-W6	L-W3	G-W3	Semua sekolah menyesuaikan dengan karakteristik siswa vokasi, namun dengan orientasi berbeda: Batulayar (praksis), Lingsar (refleksi), Gerung (analisis)
Tema 4: Pedagogi Kontekstual-Reflektif dalam Pelaksanaan PAI	4.1 Experiential Learning dan Proyek Kontekstual	B-O1, B-O2	L-O2, L-O3	G-O2, G-O3	Batulayar: contextual-collaborative-experiential learning; Lingsar: contextual-interactive-reflective learning; Gerung: dialogical-case based-practice based learning
Tema 4: Pedagogi Kontekstual-Reflektif dalam Pelaksanaan PAI	4.2 Dialog Pedagogis dan Negosiasi Makna	B-W5	L-W5	G-W4, G-W5	Lingsar menonjol pada dialog pedagogis; Batulayar pada interaksi multikultural langsung; Gerung pada studi kasus etis
Tema 4: Pedagogi Kontekstual-Reflektif dalam Pelaksanaan PAI	4.3 Refleksi sebagai Mekanisme Internalisasi Nilai	B-W7	L-O4, L-W6	G-W6	Lingsar dan Gerung menekankan refleksi sistematis; Batulayar lebih pada pengalaman autentik
Tema 5: Evaluasi Holistik-Afektif dan Pembentukan Karakter	5.1 Evaluasi Afektif dan Reflektif	B-D4, B-O4	L-D3, L-O5	G-O5, G-W7	Semua sekolah menggunakan refleksi, namun instrumen berbeda: Batulayar (jurnal+proyek), Lingsar (portofolio+observasi), Gerung (tes+refleksi terstruktur)
Tema 5: Evaluasi Holistik-Afektif dan Pembentukan Karakter	5.2 Penilaian Holistik Kognitif-Afektif-Sosial	B-D5	L-D4	G-D3, G-D4	Batulayar dan Lingsar menerapkan penilaian holistik; Gerung lebih terstruktur dengan indikator budaya eksplisit
Tema 5: Evaluasi Holistik-Afektif dan Pembentukan Karakter	5.3 Umpan Balik Formatif dan Perbaikan Berkelanjutan	B-W8	L-W7	G-D5	Gerung memiliki forum guru untuk feedback loop; Batulayar melibatkan mitra eksternal; Lingsar melalui supervisi kepala sekolah
Tema 6: Pembentukan Sensitivitas Interkultural Siswa	6.1 Adaptabilitas dan Keterlibatan Lintas Budaya	B-O1, B-W4	L-O2, L-W4	G-O2, G-W4	Batulayar unggul pada adaptabilitas dan keterlibatan aktif; Lingsar pada penghargaan dan kenikmatan interaksi; Gerung pada pemahaman kritis
Tema 6: Pembentukan Sensitivitas Interkultural Siswa	6.2 Empati, Toleransi, dan Penghargaan Perbedaan	B-O2, B-W5	L-O3, L-W5	G-O4, G-W5	Lingsar menonjol pada empati dan toleransi antaragama; Batulayar pada komunikasi lintas budaya; Gerung pada kesopanan dan martabat
Tema 6: Pembentukan Sensitivitas Interkultural Siswa	6.3 Kesadaran Kritis dan Respons Etis terhadap Keberagaman	B-W6	L-W6	G-W6	Gerung membentuk kesadaran kritis etis; Batulayar kesiapan praktis; Lingsar kedalaman makna humanis

## Sheet: 3_Kesimpulan_Verif
No	Tema	Kesimpulan Tematik	Bukti Pendukung (Kode Data)	Verifikasi Triangulasi Sumber	Verifikasi Triangulasi Teknik	Catatan Verifikasi
1	Tema 1: Integrasi Nilai Islam dan Kearifan Lokal Sasak	Perencanaan pembelajaran PAI di ketiga SMK pariwisata mengintegrasikan nilai Islam dan kearifan lokal Sasak secara sistematis dalam dokumen kurikulum (ATP, RPP, modul ajar). Integrasi ini berfungsi sebagai cultural bridge yang memperkuat landasan teologis dan kontekstual pembelajaran. Namun, terdapat variasi kedalaman: Batulayar (integratif-kontekstual), Lingsar (epistemologis-teologis dengan kai…	B-D1, B-D2, B-W1, B-W3, B-O3, L-D1, L-D2, L-W1, G-D1, G-D2, G-W1, G-W3	✓ Wawancara (Guru PAI, Kepala Sekolah, Tokoh Adat) ✓ Observasi (Kelas, Rapat) ✓ Dokumentasi (ATP, RPP, Modul)	Perbandingan hasil wawancara dengan analisis dokumen menunjukkan konsistensi integrasi nilai dalam perencanaan. Observasi kelas memperkuat bukti implementasi integrasi dalam praktik pedagogis.	Validitas tinggi. Integrasi nilai terkonfirmasi dari tiga sumber dengan konsistensi kuat. Variasi kedalaman integrasi mencerminkan konteks lokal masing-masing sekolah.
2	Tema 2: Kolaborasi Multi-Stakeholder dalam Perencanaan PAI	Kolaborasi multi-stakeholder menjadi mekanisme utama dalam perencanaan PAI di ketiga sekolah, melibatkan kepala sekolah, guru, tokoh adat, tokoh agama, dan mitra eksternal. Kolaborasi ini terinstitusionalisasi melalui TPKS/MGMP dan kebijakan kurikulum sekolah. Variasi aktor kolaborasi mencerminkan konteks lokal: Batulayar (industri pariwisata), Lingsar (tokoh lintas agama untuk harmoni sosial), d…	B-D3, B-W2, B-W8, L-W2, L-O1, L-W8, G-O1, G-W2, G-W8	✓ Wawancara (Waka Kurikulum, Tokoh FKUB, Guru) ✓ Observasi (Rapat TPKS/MGMP) ✓ Dokumentasi (SK, Kebijakan Kurikulum)	Data wawancara multi-pihak (sekolah, adat, agama, industri) saling menguatkan mengenai mekanisme kolaborasi. Dokumentasi SK dan kebijakan memverifikasi institusionalisasi kolaborasi.	Validitas tinggi. Kolaborasi terbukti dari berbagai sudut pandang aktor. Dokumentasi kebijakan memperkuat bukti institusionalisasi.
3	Tema 3: Kontekstualitas Pembelajaran PAI terhadap Kebutuhan Pariwisata	Pembelajaran PAI dirancang responsif terhadap konteks pariwisata multikultural dan karakteristik siswa vokasi. Batulayar menekankan kesiapan kerja praktis melalui paparan industri, Lingsar memanfaatkan konteks multikultural Islam-Hindu untuk membangun empati, dan Gerung fokus pada pembentukan kompetensi moral-etika. Kontekstualitas ini menjadikan PAI relevan dengan tuntutan dunia kerja global sek…	B-W2, B-W4, B-O1, B-O2, B-W6, L-W3, L-D2, L-O1, G-W2, G-O2, G-O3, G-W3	✓ Wawancara (Guru, Siswa, Mitra Industri) ✓ Observasi (Kegiatan P5, Sabtu Budaya, PKL) ✓ Dokumentasi (Modul Ajar, Program)	Kesesuaian antara perencanaan (dokumen), pelaksanaan (observasi), dan capaian (wawancara siswa/mitra) menunjukkan kontekstualitas yang konsisten. Data PKL memverifikasi relevansi dengan dunia kerja.	Validitas tinggi. Kontekstualitas terkonfirmasi melalui rantai bukti perencanaan-pelaksanaan-capai an. Data PKL menjadi verifikasi eksternal yang kuat.
4	Tema 4: Pedagogi Kontekstual-Reflektif dalam Pelaksanaan PAI	Pelaksanaan pembelajaran PAI mengadopsi pendekatan kontekstual-reflektif yang berbeda-beda: Batulayar (contextual-collaborative-experiential learning), Lingsar (contextual-interactive-reflective learning), dan Gerung (dialogical-case based-practice based learning). Ketiga pendekatan memadukan pengalaman sosial nyata, dialog nilai, dan refleksi untuk membentuk pemahaman Islam yang inklusif dan apl…	B-O1, B-O2, B-W4, B-W5, B-W7, L-O2, L-O3, L-W4, L-W5, L-O4, L-W6, G-O2, G-O3, G-W4, G-W5, G-W6	✓ Wawancara (Guru, Siswa) ✓ Observasi (Proses Pembelajaran, Kegiatan Budaya) ✓ Dokumentasi (Foto, Video, Laporan)	Pola pembelajaran yang diamati (observasi) sesuai dengan deskripsi guru dan pengalaman siswa (wawancara). Dokumentasi kegiatan (P5, Sabtu Budaya) memperkuat bukti experiential learning.	Validitas tinggi. Pendekatan pedagogis terkonfirmasi dari pengamatan langsung dan pengalaman siswa. Dokumentasi visual memperkuat bukti.
5	Tema 5: Evaluasi Holistik-Afektif dan Pembentukan Karakter	Evaluasi PAI bersifat multidimensional dengan penekanan pada aspek afektif, reflektif, dan sosial-kultural, bukan sekadar kognitif. Instrumen evaluasi mencakup jurnal refleksi, observasi sikap, portofolio, dan penilaian proyek. Batulayar menonjol pada evaluasi reflektif-holistik dengan melibatkan mitra industri, Lingsar pada supervisi visioner dan kolaborasi lintas guru, serta Gerung pada struktu…	B-D4, B-O4, B-D5, B-W7, B-W8, L-D3, L-O5, L-D4, L-W7, L-W8, G-D3, G-D4, G-O5, G-W7, G-D5	✓ Wawancara (Kepala Sekolah, Guru, Mitra) ✓ Observasi (Penilaian, Supervisi) ✓ Dokumentasi (Instrumen, Jurnal, Rapor)	Instrumen evaluasi (dokumen) sesuai dengan praktik penilaian yang diamati (observasi) dan pengalaman guru/siswa (wawancara). Hasil PKL memverifikasi validitas evaluasi afektif.	Validitas tinggi. Evaluasi afektif terkonfirmasi dari instrumen, praktik, dan hasil. Kolaborasi lintas guru memperkuat reliabilitas penilaian.
6	Tema 6: Pembentukan Sensitivitas Interkultural Siswa	Manajemen pembelajaran PAI berbasis kearifan lokal berkontribusi signifikan terhadap pembentukan sensitivitas interkultural siswa SMK pariwisata, meskipun dengan pola dan capaian yang bervariasi. Batulayar unggul pada adaptabilitas dan keterlibatan lintas budaya (dimensi afektif-partisipatif), Lingsar pada empati, toleransi, dan penghargaan perbedaan (dimensi afektif-apresiatif), serta Gerung pad…	B-O1, B-W4, B-O2, B-W5, B-W6, L-O2, L-W4, L-O3, L-W5, L-W6, G-O2, G-W4, G-O4, G-W5, G-W6	✓ Wawancara (Siswa, Guru, Wisatawan) ✓ Observasi (Interaksi Lintas Budaya, PKL) ✓ Dokumentasi (Hasil PKL, Rapor, Kuesioner)	Data kuantitatif (skor sensitivitas interkultural) selaras dengan temuan kualitatif (wawancara, observasi). Konfirmasi dari mitra industri dan hasil PKL memperkuat validitas temuan.	Validitas sangat tinggi. Temuan kuantitatif dan kualitatif saling menguatkan (triangulasi data). Konfirmasi multi-pihak (siswa, guru, mitra) memperkuat keabsahan.

## Sheet: 4_Proposisi
No	Aspek	Proposisi	Rumusan Proposisi	Kode Data Pendukung	Status Verifikasi
1	Perencanaan	Proposisi 1: Integrasi Nilai dan Sensitivitas Interkultural	Perencanaan pembelajaran PAI yang mengintegrasikan nilai-nilai Islam dan kearifan lokal secara sistematis berfungsi sebagai cultural bridge yang memperkuat pembentukan sensitivitas interkultural siswa	B-D1, B-D2, L-D1, L-D2, G-D1, G-D2	Terverifikasi
2	Perencanaan	Proposisi 2: Kontekstualitas Perencanaan dan Relevansi Global	Perencanaan pembelajaran PAI yang bersifat kontekstual dan selaras dengan karakteristik dunia kerja pariwisata global cenderung menghasilkan tingkat keterlibatan dan adaptabilitas interkultural siswa yang lebih tinggi	B-W2, B-W4, L-W3, G-W2	Terverifikasi
3	Perencanaan	Proposisi 3: Kolaborasi Kelembagaan dan Kualitas Perencanaan	Perencanaan pembelajaran PAI yang disusun melalui mekanisme kolaboratif dan terinstitusionalisasi meningkatkan konsistensi implementasi nilai serta efektivitas pembentukan sikap interkultural siswa	B-D3, B-W2, L-W2, L-O1, G-O1, G-W2	Terverifikasi
4	Perencanaan	Proposisi 4: Keselarasan Nilai dan Keberlanjutan Praktik	Perencanaan nilai yang aligned antara dokumen kurikulum, praktik pedagogis, dan budaya sekolah berkontribusi pada keberlanjutan internalisasi nilai Islam dan kearifan lokal	B-W3, B-W8, L-W8, G-W8	Terverifikasi
5	Perencanaan	Proposisi 5: Perencanaan Adaptif dan Responsivitas Kontekstual	Perencanaan pembelajaran PAI yang bersifat reflektif dan adaptif terhadap dinamika sosial-budaya lokal dan tuntutan global memungkinkan sekolah menyesuaikan strategi pembelajaran secara berkelanjutan	B-W1, L-W1, G-W1	Terverifikasi
6	Perencanaan	Proposisi 6: Kualitas Perencanaan dan Capaian Afektif Siswa	Variasi capaian sensitivitas interkultural siswa lintas situs dapat dijelaskan oleh perbedaan kualitas perencanaan pembelajaran PAI, khususnya dalam aspek integrasi nilai, kontekstualitas, kolaborasi, dan adaptabilitas	B-W6, L-W6, G-W6	Terverifikasi
7	Pelaksanaan	Proposisi 1: Kontekstualitas Pembelajaran dan Sensitivitas Interkultural	Pelaksanaan pembelajaran PAI yang kontekstual dan berakar pada realitas sosial-budaya lokal memungkinkan siswa memaknai ajaran Islam secara aplikatif, sehingga mendorong berkembangnya sensitivitas interkultural	B-O1, B-W4, L-O2, L-W4, G-O2, G-W4	Terverifikasi
8	Pelaksanaan	Proposisi 2: Pengalaman Multikultural Autentik sebagai Faktor Kunci	Semakin tinggi intensitas pengalaman multikultural autentik yang dialami siswa melalui pembelajaran PAI, semakin tinggi pula tingkat adaptabilitas dan keterlibatan interkultural siswa	B-O1, B-O2, L-O2, L-O3, G-O2, G-O3	Terverifikasi
9	Pelaksanaan	Proposisi 3: Peran Pedagogi Kolaboratif dan Dialogis	Pelaksanaan pembelajaran PAI yang mengombinasikan pedagogi kolaboratif dan dialogis menciptakan ruang refleksi kritis dan empatik, yang berkontribusi signifikan terhadap pembentukan sikap toleran	B-W5, L-W5, G-W4, G-W5	Terverifikasi
10	Pelaksanaan	Proposisi 4: Adaptasi Metode Guru dan Efektivitas Pembelajaran	Fleksibilitas dan adaptasi pedagogis guru PAI dalam mengaitkan nilai Islam dengan konteks lokal dan kebutuhan dunia kerja pariwisata meningkatkan efektivitas pembelajaran dalam membentuk sensitivitas interkultural siswa	B-O3, L-O3, L-O4, G-W3	Terverifikasi
11	Pelaksanaan	Proposisi 5: Lingkungan Sosial Sekolah sebagai Variabel Kontekstual	Variasi capaian sensitivitas interkultural siswa lintas situs dipengaruhi oleh karakteristik lingkungan sosial sekolah, khususnya tingkat heterogenitas budaya dan peluang interaksi lintas budaya	B-O2, L-D2, G-O4	Terverifikasi
12	Pelaksanaan	Proposisi 6: Keterpaduan Nilai, Pengalaman, dan Refleksi	Pelaksanaan pembelajaran PAI yang memadukan integrasi nilai, pengalaman sosial nyata, dan proses refleksi sistematis cenderung menghasilkan sensitivitas interkultural siswa yang lebih matang dan berkelanjutan	B-W7, L-W6, L-O4, G-W6	Terverifikasi
13	Evaluasi	Proposisi 1: Evaluasi Multidimensional dan Sensitivitas Interkultural	Evaluasi pembelajaran PAI yang bersifat multidimensional berkontribusi terhadap penguatan sensitivitas interkultural siswa secara lebih utuh dibanding evaluasi yang berfokus pada capaian kognitif semata	B-D4, B-D5, L-D3, L-D4, G-D3, G-D4	Terverifikasi
14	Evaluasi	Proposisi 2: Refleksi sebagai Mekanisme Internalisasi Nilai	Penggunaan refleksi personal dan refleksi sosial sebagai instrumen evaluasi PAI memungkinkan siswa menginternalisasi nilai Islam dan kearifan lokal secara lebih mendalam	B-W7, L-W7, G-W7	Terverifikasi
15	Evaluasi	Proposisi 3: Kontekstualitas Evaluasi dan Relevansi Sosial	Evaluasi PAI yang dikaitkan dengan pengalaman sosial nyata, praktik budaya lokal, dan konteks dunia kerja pariwisata meningkatkan relevansi pembelajaran dan memperkuat kemampuan siswa menerapkan nilai keislaman dalam situasi multikultural	B-O4, L-O5, L-O6, G-O5	Terverifikasi
16	Evaluasi	Proposisi 4: Kolaborasi dan Supervisi dalam Penguatan Evaluasi Afektif	Keterlibatan kepala sekolah, guru lintas mata pelajaran, serta mekanisme supervisi yang berkelanjutan memperkuat konsistensi dan kualitas evaluasi afektif PAI dalam membentuk sikap toleran	B-W8, L-W8, G-W8	Terverifikasi
17	Evaluasi	Proposisi 5: Struktur Evaluasi dan Konsistensi Nilai	Evaluasi PAI yang terstruktur dan sistematis, dengan indikator nilai yang jelas dan berkesinambungan, membantu menjaga konsistensi antara tujuan pembelajaran, praktik pedagogis, dan capaian karakter siswa	B-D5, L-D4, G-D4	Terverifikasi
18	Evaluasi	Proposisi 6: Umpan Balik Formatif dan Perkembangan Sensitivitas Interkultural	Penyediaan umpan balik formatif yang berkelanjutan dalam evaluasi PAI mendukung perkembangan sensitivitas interkultural siswa secara progresif, khususnya dalam aspek empati dan kemampuan berinteraksi secara etis	B-W8, L-W7, G-D5	Terverifikasi
